# Supplementary material for: Physiological and biochemical characteristics and microbial responses of Medicago sativa (Fabales: Fabaceae) varieties with different resistance to atrazine stress
Source: Frontiers journal article supplement (doi:10.3389/fmicb.2024.1447348), 2024-08-16
Supplement: Table_2.XLS [file Table_2.XLS]

## Sheet: P450
	Root												Shoot
	JN5010ATZ			JN5010CK			WL363ATZ			WL363CK			JN5010ATZ			JN5010CK			WL363ATZ			WL363CK
gene id	H3	H2	H1	G3	G2	G1	F3	F2	F1	E3	E2	E1	D3	D2	D1	C3	C2	C1	B3	B2	B1	A3	A2	A1
MS.gene031988	0.56	0	0	0.54	0.43	0.11	0	0.1	0	0	0.19	0	1.95	0.53	0	29.2	11.27	20.43	0	20.91	8.32	1.6	3.62	7.55
MS.gene26636	1.02	3.73	1.84	0	0.07	0.03	1.51	0	0.23	0	0	0.21	4.29	3.55	0.28	0.04	0.2	0	1.57	0	1	0	0.21	0.19
MS.gene82455	0.99	0.31	0.12	1.74	0.18	0.67	0.75	8.07	7.67	0	0.16	0.4	0.38	0.7	0	0.16	2.07	0.37	0.12	2.06	0.06	0.11	0	0.1
MS.gene01255	0	0	0	0	0	0.01	0	0	0	0.06	0.01	0	1.96	8.27	1.23	0.03	0.03	0	1.24	2.09	3.72	0	0.02	0.03
MS.gene80817	1.08	1.51	1.15	0.08	0	0.08	2.44	0.96	0.67	0.25	0.3	1.06	24.59	3.39	6.67	3.91	4.1	6.12	6.48	6.22	15.28	2.69	2.52	1.98
MS.gene02234	0	0	0	0	0	0.01	0	0	0	0.06	0.01	0	1.96	8.27	1.23	0.03	0.03	0	1.24	2.09	3.72	0	0.02	0.03
MS.gene028243	0.85	0.63	0.18	15.08	14.6	15.08	1.47	0.36	0.85	5.88	6.87	6.96	0.14	7.89	0.25	5.43	3.06	0	1.03	0.82	0	0	0	0
MS.gene044048	0	0	0	0	0.21	0	0	0	0	0	0	0	0.5	0.43	0.44	1.43	0	0	0	5.03	1.48	0	0	0
MS.gene50601	9.1	5.08	10.98	15.29	7.27	10.77	9.34	13.29	13.5	9.34	5.32	3.67	0.68	1.1	1.03	0.84	0.16	0.15	0.77	3.75	1.07	0.13	0.06	0
MS.gene016183	3.41	8.79	1.23	1.15	1.03	0.97	5.82	7.27	11.18	1.47	0.34	0.67	3.55	4.68	3.12	0.98	0.78	0.41	1.69	3.69	0	0	0	0
MS.gene79436	0	0	0	1.74	0.71	2.32	0.54	0	0	0	0	1.24	0	0.59	0	0.5	0.51	0	0	0	1.13	0	0	0
MS.gene57346	0	0	0	0	0	0	0	0	0	0	0	0	0	0.72	6.64	3.48	1.63	0.34	0	0	0	2.88	7.8	1.66
MS.gene007819	0.06	1.68	0.53	0.72	0	0	2.21	0.65	0.3	0	0	0	0.56	0.39	0.13	0.11	0.22	0	1.35	0.22	0	0.25	0	0.03
MS.gene28019	0.36	5.22	0	0.03	0	0	34.33	5.87	3.12	0	0	0.92	1.55	0.67	1.23	0	0.13	0.6	0	1.19	0.55	5.08	0.67	10.35
MS.gene002275	0	0	0	0	0	0.01	0	0	0	0.06	0.01	0	6.33	4.01	1.15	0.03	0.03	0	0	0.58	0	0	0.02	0.03
MS.gene047829	4.38	7.09	4.57	0.09	0.04	0	3.35	1.09	2.08	0.65	0	0.27	4.97	4.71	0.75	0.09	0.59	0	2.28	1.29	2.06	0.09	0.22	0.43
MS.gene08408	7.59	6.04	8.79	9.65	3.54	12.41	0.75	0	0.12	3.65	4.65	14.64	0.05	4.25	0.81	0.03	0.63	0.03	0.29	0.23	0.53	0.55	0.23	0.44
MS.gene32273	3.79	5.1	3.75	1.43	0.18	1.06	9.53	2.18	1.07	0	0	0	0.13	0	0.52	0	0	0.15	0.51	0.16	0.04	0.16	0	0
MS.gene053506	1.58	0.3	1.31	0	0	0	1.97	0	0.1	0.17	0	0	0.23	1.15	0	0	0	0	0	0.14	0.04	0.33	0	0.15
MS.gene86458	0.99	0.31	0.12	1.74	0.18	0.67	0.75	8.07	7.67	0	0.16	0.4	0.38	0.7	0	0.16	2.07	0.37	0.12	2.06	0.06	0.11	0	0.1

## Sheet: GST
	Root												Shoot
	JN5010ATZ			JN5010CK			WL363ATZ			WL363CK			JN5010ATZ			JN5010CK			WL363ATZ			WL363CK
gene id	H3	H2	H1	G3	G2	G1	F3	F2	F1	E3	E2	E1	D3	D2	D1	C3	C2	C1	B3	B2	B1	A3	A2	A1
MS.gene30885	0.15	3.59	0	0	31.57	0	21.19	33.21	0.05	0.03	72.31	79.6	0.02	0	0	2.82	2.04	21	39.93	0	34.16	2.78	0	9.13
MS.gene039177	1.17	2.15	0.23	2.93	3.26	6.37	1.01	1.19	0.07	10.91	9.37	22.45	9.26	16.14	10.68	11.58	14.21	11.5	8.83	7.37	11.08	11.62	17.42	9.22
MS.gene84233	10.05	6.43	5.07	13.84	20.83	9.04	2.17	0.81	2.57	39.22	12.22	9.59	3.69	0.95	8.08	13.35	14.95	60.04	8.32	2.18	1.68	62.65	56.84	173.9
MS.gene032887	268.01	302.29	237.9	291.43	227.33	160.4	551.54	321.59	312.25	229.53	235.54	341.33	2.51	17.05	0	0.25	6.11	0	2.04	1.13	8.38	0	0	0.13
MS.gene02966	26.76	0	0	0	0	11.2	63.51	28.31	16.77	0	0	0	0	79.44	0	0	0	59.24	0	28	62.95	0	0	4.08
MS.gene21349	93.15	33.84	28.67	66.62	19.03	36.35	48.03	97.7	115.61	256.98	10.95	60.65	15.66	0	40.74	29.11	0	0	70.19	39.23	89.69	3.09	0	5.6
MS.gene94267	0.07	0	0.36	0	12.22	0	0	0	0	14.19	1.67	0.55	0	12.18	0.91	0	10.91	2.91	15.16	0.16	0.65	0	14.53	0.17
MS.gene005690	16.44	321.86	159.61	151.43	405.4	329.15	57.39	0.12	203.57	137.67	209.26	55.54	94.36	246.72	93.65	38.29	41.6	130.89	63.05	76.63	58.79	4.99	12.79	5.96
MS.gene029889	9.06	21.26	7.99	14.85	2.21	11.23	12.65	41.99	33.27	5.04	1.55	0.88	50.93	97.03	51.8	112.54	24.48	5.24	46.26	101.89	16.81	13.24	4.51	31.46
MS.gene21350	94.67	48.34	32.39	78.01	35.83	66.59	48.59	107.3	139.66	223.97	42.65	96.87	11.34	0.53	17.74	22.42	1.13	0.49	33.64	28.13	41.56	2.05	0.68	6.74
MS.gene05142	4.11	7.79	4.28	0.43	0	0.3	0.99	1.85	4.45	0	6.89	0	15.54	3.48	0	0	0.26	1.82	7.79	3.66	0	0.03	1.09	0

## Sheet: ABC
	Root												Shoot
	JN5010ATZ			JN5010CK			WL363ATZ			WL363CK			JN5010ATZ			JN5010CK			WL363ATZ			WL363CK
gene id	H3	H2	H1	G3	G2	G1	F3	F2	F1	E3	E2	E1	D3	D2	D1	C3	C2	C1	B3	B2	B1	A3	A2	A1
MS.gene90850	0.65	2.03	0.95	0.72	1.09	1.87	2.43	4.09	2.9	1.02	1.06	0.57	4.21	3.41	2.5	1.02	1.95	1.82	0.34	1.51	3.2	0.63	1.05	0.69
MS.gene78925	0.06	0.02	0	0	0.1	0.15	0.03	0.19	0.3	0	0	0	0.46	0.79	0.83	0.17	0.67	0.51	0.27	0.23	0.5	0.42	0.23	0.24
MS.gene75159	2.64	1.03	3.89	0.67	2.01	2.08	4.72	6.6	5.34	0.7	1.14	1.2	1.01	1.1	3.85	0.05	3.28	1.07	5.08	3.89	0.06	0.92	0.47	0.98
MS.gene74724	2.88	2.29	3.15	0.74	0.88	0.66	5.13	1.33	0.72	1.91	1.38	0.76	0.36	0.24	0.33	0.08	0.36	0.82	0.7	0.19	0.3	0.03	0.53	0.16
MS.gene73845	0.94	0.74	0.68	2.29	2.27	2	1.16	1.05	1.1	1.62	1.62	2.16	0.04	0	0.03	0.02	0.1	0.08	0.04	0.02	0.58	0.23	0.14	0.1
MS.gene72094	0.94	0.69	1.05	2.76	1.29	0.5	0.2	0.54	0.28	1.16	4.32	7.97	0.05	0.05	0.03	0	0.63	0.02	0	0.05	0.03	0	0	0
MS.gene68632	10.66	17.61	12.65	9.12	8.42	14.37	13.65	31.88	28.02	9.54	14.64	8.92	4.02	3	4.23	3.96	3.08	3.64	5.25	5.8	1.67	3.61	3.57	2.22
MS.gene68631	13.64	14.96	4.4	6.06	5.95	10.04	13.36	21.7	20.97	8.74	11.3	4.44	0.08	0.65	0.09	0	0.05	0	0.04	0.42	0.57	0	0	0
MS.gene57154	15.94	11.45	18.04	15.82	9.19	14.75	9.89	9.23	14.35	16.86	14.22	12.41	7.12	1.25	3.25	1.55	5.39	2.32	2.35	3.97	3	1.35	1.97	1.52
MS.gene57035	0	0	0	0.22	0.04	0.2	0	0.05	0	0	0.04	0.11	1.37	0.88	0.35	2.85	8.17	2.54	0.11	0.17	0.82	3.07	3.19	3.31
MS.gene26775	1.03	0.2	0.79	1.21	2.52	1.63	0.3	5.72	5.55	4.83	1.89	3.85	1.63	14.75	3.07	0.75	3.09	0.02	0.98	7.87	2.91	0.35	0.61	1.01
MS.gene24127	0	0.95	0.6	0	0.26	0.04	0.18	0.56	0.4	0.04	0.05	0.07	1.21	1.2	0.82	0	1.04	0.17	0.72	0.78	0	0.41	0	0
MS.gene21237	0.37	0.66	0.34	0.28	1.47	0.98	0	1.95	2.23	1.1	0.69	0.32	0	0.53	0.75	0	0	0	0.39	0.65	0.32	0	0	0
MS.gene07361	2.15	7.46	0.91	1.27	0.15	0.27	6.47	6.99	7.28	1.53	1.41	11	2.15	0.7	0	0.22	0	0	2.26	1.78	0.39	0	0	0.02
MS.gene064142	9.19	22.56	19.81	8.32	4.3	3.37	19.02	21.43	20.88	11.77	13.45	12.5	0.2	0.4	0.07	0.06	0.19	0.16	0.11	0.17	0.12	0.06	0.05	0.2
MS.gene064141	1.43	1.9	0.88	0.69	0.66	1.77	2.71	5.57	5.71	0.99	1.41	1.03	0.04	0.08	0.13	0.07	0.29	0.41	0.02	0.38	0.08	0.07	0.2	0.2
MS.gene059562	1.52	1.53	1.84	3.22	2.17	4.7	0.58	1.18	1.68	4.09	8.01	5.17	0.02	0.05	0.05	0	0.32	0	0.03	0.11	0.03	0	0	0.06
MS.gene051895	11.41	7.97	7.84	2.21	2	1.51	11.09	12.93	10.92	3.79	3.87	5.11	10.33	9.16	4.68	2.94	3.02	2.7	2.42	6.47	3.69	6.28	3.16	6.39
MS.gene014105	1.33	1.84	3	0.26	0.28	0.51	0.39	2.02	1.41	4.5	0.34	2.03	0.73	0.61	1.63	0.03	0.09	0.16	0.65	0.37	0.05	0.21	0.1	0.05
MS.gene013302	0.6	1.1	0.1	1.87	1.06	1.21	0.46	0.31	0.38	1.85	3.01	1.62	0.74	0.29	0.12	0.44	0.38	1.47	0.63	0.14	1.07	0.55	0.28	0.16
MS.gene007547	0.08	0	0.1	0.33	0.62	0.64	0	0.23	0.17	0.23	0.01	0.13	0.07	0.53	0	0.39	1.1	0.38	0.07	0.08	0	0	0.11	0
MS.gene007077	21.65	11.79	18.87	9.83	5.68	8.05	17.13	10.77	10.65	9.17	7.59	9.09	18.18	20.91	13.49	9.37	8.02	4.3	12.87	11.36	15.5	11.27	9.09	15.86
MS.gene006568	0.94	0.74	0.68	1.65	2.27	2	1.16	1.05	1.1	1.62	1.62	2.16	0.04	0	0.03	0.02	0.1	0.08	0.04	0.02	0.58	0.23	0.14	0.1
MS.gene005430	16.12	19.63	17.35	15.66	13.47	19.65	11.36	40.18	31.41	10.29	13.94	15.61	6.49	8.99	8.67	2.07	4.8	10.61	3.04	4.53	4.62	1.24	1.5	2.25
